# Supplementary material for: Repeated BCG treatment of mouse bladder selectively stimulates small GTPases and HLA antigens and inhibits single-spanning uroplakins
Source: Springer Nature journal article supplement (doi:10.1186/1471-2407-7-204), 2007-11-02
Supplement: Additional file 16 [file 1471-2407-7-204-s16.pdf]

**Table 4 Genes Downregulated by BCG**

**Known Genes**

| <i>Plate_Clone</i>    | <i>NCBI</i>                    | <i>Link to UCSC Genome</i> | <i>Abbrev</i> | <i>Description</i>                                      | <i>Location</i>     | <i>Type</i> | <i>Function</i>                  |
|-----------------------|--------------------------------|----------------------------|---------------|---------------------------------------------------------|---------------------|-------------|----------------------------------|
| C1_E8                 | <a href="#">AL837521.6</a>     | <a href="#">Aqp3</a>       | AQP3          | <a href="#">aquaporin 3</a>                             | Plasma Membrane     | transporter |                                  |
| C2_H8                 | <a href="#">NM_007657.3</a>    | <a href="#">Cd9</a>        | CD9           | CD9 antigen                                             | Plasma Membrane     | other       | protein binding                  |
| C2_B12                | <a href="#">NM_025902.2</a>    | <a href="#">Cisd2</a>      | Cisd2/ZCD2    | <a href="#">CDGSH iron sulfur domain 2</a>              | Unknown             | other       |                                  |
| C2_A12                | <a href="#">NM_010357.2</a>    | <a href="#">Gsta4</a>      | GSTA4         | glutathione S-transferase, alpha 4                      | Cytoplasm           | enzyme      | glutathione transferase activity |
| C1_C7, C2_C12, C2_M13 | <a href="#">BC046758.1</a>     | <a href="#">Gstm1</a>      | GSTM1/ GSTM5  | glutathione S-transferase, mu 1,                        | Cytoplasm           | enzyme      | glutathione transferase activity |
| C2_E8                 | <a href="#">AC158993.2</a>     | <a href="#">Lgi4</a>       | LG14          | <a href="#">leucine-rich repeat LGI family member 4</a> | Extracellular Space | other       |                                  |
| C1_D1                 | <a href="#">NM_025348.1</a>    | <a href="#">Ndufa3</a>     | NDUFA3        | NADH dehydrogenase (ubiquinone) 1 alpha subo            | Cytoplasm           | enzyme      | oxireductase activity            |
| C1_C11                | <a href="#">NM_023133.1</a>    | <a href="#">Rps19</a>      | RPS19         | ribosomal protein S19                                   | Cytoplasm           | other       |                                  |
| C1_A12                | <a href="#">XM_001000192.1</a> | <a href="#">Sprr2a</a>     | SPRR2G        | <a href="#">small proline-rich protein 2A</a>           | Cytoplasm           | other       |                                  |
| C2_A9                 | <a href="#">AL772308.4</a>     | <a href="#">Upk3a</a>      | UPK3A         | <a href="#">uroplakin 3A</a>                            | Plasma Membrane     | other       |                                  |

**Unknown Genes**

| <i>Plate_Clone</i>                 | <i>NCBI</i>                 | <i>Link to UCSC Genome</i>    | <i>Abbrev</i>       | <i>Description</i>                           | <i>Location</i> | <i>Type</i> | <i>Function</i> |
|------------------------------------|-----------------------------|-------------------------------|---------------------|----------------------------------------------|-----------------|-------------|-----------------|
| C2_G8                              | <a href="#">AC161870.4</a>  |                               | clone RP24-70M22    | BAC clone RP24-70M22 from chromosome 14      | Unknown         | Unknown     |                 |
| C1_B10, C1_D6, C1_E4, C1_G2, C1_H7 | <a href="#">AY999076.1</a>  |                               | mitochondrion       | Mus musculus cell-line NIH/3T3 mitochondrion | Unknown         | Unknown     |                 |
| C1_E11                             | <a href="#">BC012020.1</a>  |                               | clone IMAGE:4500967 | Hypothetical protein                         | Unknown         | Unknown     |                 |
| C2_B4                              | <a href="#">EF108344.1</a>  |                               | mitochondrion       | Mus musculus domesticus strain WSB/EiJ       | Unknown         | Unknown     |                 |
| C2_B6                              | <a href="#">NM_025856.2</a> | <a href="#">1700029G01Rik</a> | 1700029G01RIK       | preimplantation mouse development            | Unknown         | Unknown     |                 |
| C1_E12                             | <a href="#">AK153940.1</a>  |                               | A130040M12RIK       | RIKEN cDNA A130040M12 gene                   | Unknown         | Unknown     |                 |
