# Supplementary material for: Repeated BCG treatment of mouse bladder selectively stimulates small GTPases and HLA antigens and inhibits single-spanning uroplakins
Source: Springer Nature journal article supplement (doi:10.1186/1471-2407-7-204), 2007-11-02
Supplement: Additional file 18 [file 1471-2407-7-204-s18.pdf]

**Table 6 IPA analysis of Control-specific genes**

| <i>TOP NETWORKS ASSOCIATED NETWORKS FUNCTIONS</i>    |                                                                          |                 |          |                 |                 | Score      |
|------------------------------------------------------|--------------------------------------------------------------------------|-----------------|----------|-----------------|-----------------|------------|
| 1                                                    | Cancer, Cellular Movement, Cell-To-Cell Signaling                        |                 |          |                 |                 | 10         |
| 2                                                    | Vitamin and Mineral Metabolism, Carbohydrate metabolism, Cell Signalling |                 |          |                 |                 | 3          |
| 3                                                    | Cancer, Cell Morphology, Cell-To-Cell Signaling                          |                 |          |                 |                 | 3          |
| 4                                                    | Cellular Development, Immunological Disease, Cell Cycle                  |                 |          |                 |                 | 3          |
| <i>DISEASES AND DISORDERS</i>                        |                                                                          |                 |          |                 |                 | #Molecules |
|                                                      | Lower                                                                    |                 | Upper    |                 | Threshold       |            |
|                                                      | p value                                                                  | -.log (p-value) | p value  | -.log (p-value) | -.log (p-value) |            |
| Genetic Disorder                                     | 1.17E-03                                                                 | 2.93            | 1.10E-02 | 1.96            | 1.35            | 1          |
| Hematological Disease                                | 1.17E-03                                                                 | 2.93            | 9.30E-02 | 1.03            | 1.35            | 2          |
| Immunological Disease                                | 1.17E-03                                                                 | 2.93            | 3.50E-03 | 2.46            | 1.35            | 1          |
| Renal and Urological Disease                         | 1.17E-03                                                                 | 2.93            | 1.40E-02 | 1.85            | 1.35            | 2          |
| Skeletal and Muscular Disorders                      | 2.34E-03                                                                 | 2.63            | 8.10E-03 | 2.09            | 1.35            | 1          |
| <i>MOLECULAR AND CELLULAR FUNCTIONS</i>              |                                                                          |                 |          |                 |                 | #Molecules |
|                                                      | Lower                                                                    |                 | Upper    |                 | Threshold       |            |
|                                                      | p value                                                                  | -.log (p-value) | p value  | -.log (p-value) | -.log (p-value) |            |
| Cell Morphology                                      | 5.86E-04                                                                 | 3.23            | 3.40E-02 | 1.47            | 1.35            | 3          |
| Amino Acid Metabolism                                | 1.11E-03                                                                 | 2.95            | 1.10E-04 | 3.96            | 1.35            | 2          |
| Cell Death                                           | 1.17E-03                                                                 | 2.93            | 1.90E-03 | 2.72            | 1.35            | 2          |
| Cell-To-Cell Signaling                               | 1.17E-03                                                                 | 2.93            | 3.80E-02 | 1.42            | 1.35            | 1          |
| Cellular Assembly and Organization                   | 1.17E-03                                                                 | 2.93            | 2.60E-02 | 1.59            | 1.35            | 1          |
| <i>PHYSIOLOGYCAL SYSTEM DEVELOPMENT AND FUNCTION</i> |                                                                          |                 |          |                 |                 | #Molecules |
|                                                      | Lower                                                                    |                 | Upper    |                 | Threshold       |            |
|                                                      | p value                                                                  | -.log (p-value) | p value  | -.log (p-value) | -.log (p-value) |            |
| Nervous System and Development and Function          | 5.86E-04                                                                 | 3.23            | 3.60E-03 | 2.44            | 1.35            | 2          |
| Reproductive System Development and Function         | 5.86E-04                                                                 | 3.23            | 4.60E-02 | 1.34            | 1.35            | 3          |
| Tissue Morphology                                    | 5.86E-04                                                                 | 3.23            | 3.90E-02 | 1.41            | 1.35            | 3          |
| Hematological System Development and Function        | 1.17E-03                                                                 | 2.93            | 4.70E-02 | 1.33            | 1.35            | 2          |
| Immune Response                                      | 1.17E-03                                                                 | 2.93            | 4.70E-02 | 1.33            | 1.35            | 2          |
| <i>TOP CANONICAL PATHWAYS</i>                        |                                                                          |                 |          |                 |                 | Ratio      |
|                                                      |                                                                          |                 | p value  | -.log (p-value) |                 |            |
| Glutathione Metabolism                               |                                                                          |                 | 1.11E-03 | 2.95            | 2/102 (0.2)     |            |
| NRF2-mediated Oxidative Stress                       |                                                                          |                 | 2.58E-03 | 2.59            | 2/142 (0.014)   |            |
| Aryl Hydrocarbon Receptor Signalling                 |                                                                          |                 | 2.58E-03 | 2.59            | 2/147 (0.014)   |            |
| LPS/IL-1 Mediated Inhibition of RXR Function         |                                                                          |                 | 4.07E-03 | 2.39            | 2/170 (0.012)   |            |
| Metabolism of Xenobiotics by Cytochrome P450         |                                                                          |                 | 6.46E-03 | 2.19            | 2/213 (0.009)   |            |
| <i>Top Tox List</i>                                  |                                                                          |                 |          |                 |                 | Ratio      |
|                                                      |                                                                          |                 | p value  | -.log (p-value) |                 |            |
| Oxidative Stress                                     |                                                                          |                 | 4.79E-04 | 3.32            | 2/57 (0.035)    |            |
| Xenobiotic Metabolism                                |                                                                          |                 | 2.42E-03 | 2.62            | 2/129 (0.016)   |            |
| Mitochondrial Dysfunction                            |                                                                          |                 | 4.37E-02 | 1.36            | 1/76 (0.013)    |            |
