# Supplementary figures and images for: Repeated BCG treatment of mouse bladder selectively stimulates small GTPases and HLA antigens and inhibits single-spanning uroplakins
Source: Springer Nature journal article supplement (doi:10.1186/1471-2407-7-204), 2007-11-02

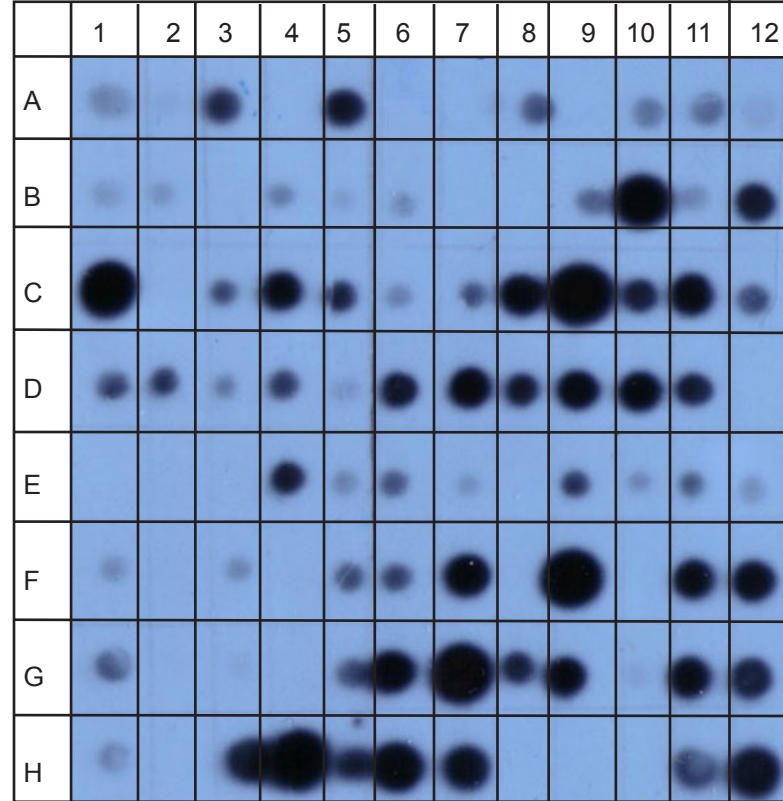

A = DRIVER-SPECIFIC

PLATE T-2

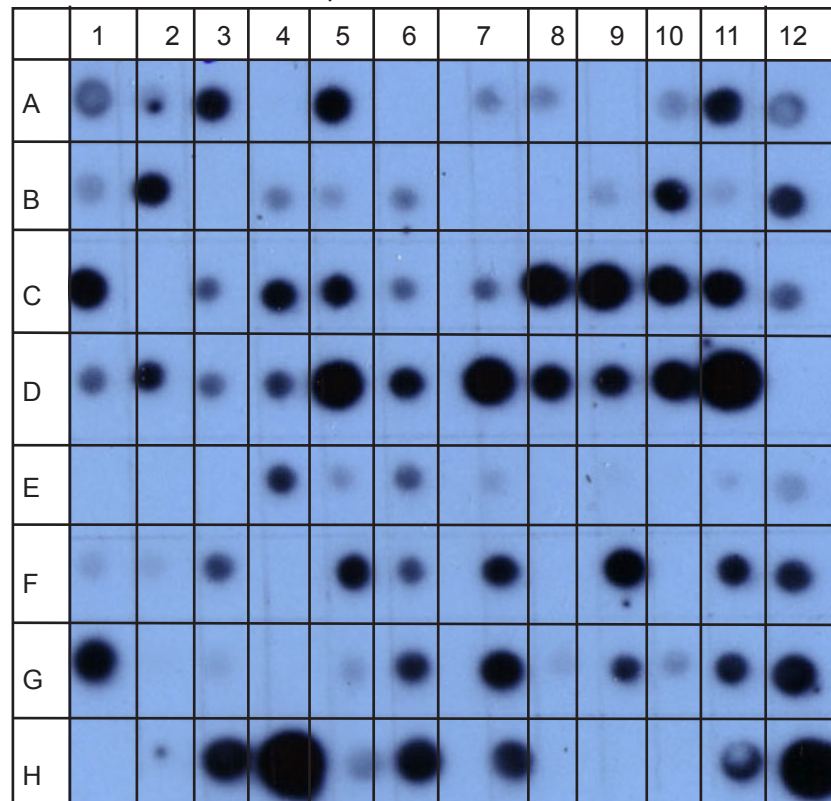

B = TESTER-SPECIFIC

Supplement: Additional file 9 [file 1471-2407-7-204-s9.pdf]
